# Supplementary material
Source: publisher figshare collection journal article supplement (https://tandf.figshare.com/ndownloader/files/12660800)
Supplement: Supplementary file 1 [file 12660800]

Observed means (standard errors) for each combination between isolate and exposure time

|  | Exposure time | | | | |
| --- | --- | --- | --- | --- | --- |
| Isolate | 0 | 2 | 4 | 6 | 8 |
| 1296 | 1.00(0.00) | 0.99(0.00) | 0.99(0.01) | 0.95(0.02) | 0.69(0.12) |
| 1741 | 1.00(0.00) | 0.98(0.01) | 0.97(0.01) | 0.82(0.05) | 0.18(0.05) |
| 1998 | 0.99(0.01) | 0.98(0.01) | 0.97(0.01) | 0.79(0.12) | 0.42(0.17) |
| 2778 | 0.99(0.01) | 0.99(0.00) | 0.91(0.06) | 0.87(0.07) | 0.46(0.15) |
| 3300 | 0.97(0.02) | 0.91(0.05) | 0.88(0.08) | 0.75(0.13) | 0.37(0.17) |
| 3302 | 0.99(0.00) | 0.97(0.01) | 0.89(0.06) | 0.57(0.22) | 0.29(0.20) |
| 3307 | 0.94(0.05) | 0.90(0.08) | 0.82(0.11) | 0.41(0.14) | 0.03(0.03) |
| A152.I | 0.99(0.00) | 0.98(0.01) | 0.92(0.05) | 0.55(0.11) | 0.06(0.03) |
| C23.I | 0.99(0.01) | 0.98(0.01) | 0.96(0.01) | 0.71(0.04) | 0.18(0.05) |
| E149.I | 0.98(0.01) | 0.96(0.02) | 0.91(0.06) | 0.71(0.14) | 0.37(0.17) |
| E71.I | 0.98(0.01) | 0.94(0.04) | 0.89(0.06) | 0.69(0.13) | 0.18(0.08) |
| IT1-I2 | 1.00(0.00) | 0.98(0.01) | 0.94(0.04) | 0.78(0.16) | 0.61(0.21) |
| IT2-I10 | 1.00(0.00) | 0.99(0.01) | 0.89(0.07) | 0.68(0.22) | 0.43(0.25) |
| SB4-I7 | 1.00(0.00) | 0.97(0.01) | 0.94(0.03) | 0.85(0.06) | 0.46(0.16) |
